# Supplementary material for: Low temperature synthesis of graphite on Ni films using inductively coupled plasma enhanced CVD
Source: Royal Society of Chemistry journal article supplement (doi:10.1039/c5tc00635j), 2015-01-01
Supplement: c5tc00635j1.pdf [file c5tc00635j1.pdf]

1

## Supplementary information for

### 2 **Low temperature synthesis of graphite on Ni films using inductively coupled plasma** 3 **enhanced CVD**

4 Lanxia Cheng <sup>a</sup>, Kayoung Yun <sup>b</sup>, Antonio Lucero <sup>a</sup>, Jie Huang <sup>c</sup>, Xin Meng <sup>a</sup>, Guoda Lian  
5 <sup>a</sup>, Ho-Seok Nam <sup>b</sup>, Robert M. Wallace <sup>a</sup>, Moon Kim <sup>a</sup>, Archana Venugopal <sup>c</sup>, Luigi  
6 Colombo <sup>c</sup>, Jiyoung Kim <sup>a,\*</sup>

7 <sup>a</sup>Department of Materials Science and Engineering, The University of Texas at Dallas,  
8 800 W. Campbell Road, Richardson, Texas 75080, USA

9 <sup>b</sup>School of Advanced Materials Engineering, Kookmin University, Seoul, Korea

10 <sup>c</sup>Texas Instruments, Dallas, Texas 75080, USA

11

### 12 Supplementary materials:

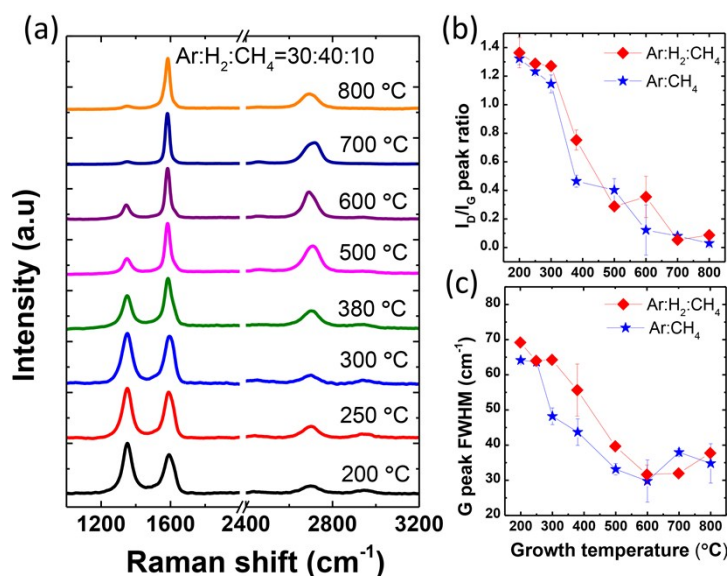

13

14 Fig. S1 - Temperature dependent Raman spectra of graphite films on polycrystalline Ni  
15 surface at plasma power of 50 W for 300 s using the Ar:H<sub>2</sub>:CH<sub>4</sub>(40:30:10) gas mixture,  
16 (b) corresponding intensity ratios of D and 2D to G band, (c) FWHM of G band in  
17 reference to that of samples prepared using hydrogen-free (Ar:CH<sub>4</sub> =70:10) gas.

\* Corresponding authors: Tel:+1 972-883-6412,  
E-mail: [jiyoung.kim@utdallas.edu](mailto:jiyoung.kim@utdallas.edu), [lanxia.cheng@utdallas.edu](mailto:lanxia.cheng@utdallas.edu)

18 Fig. S1 shows the Raman characteristics of graphitic films on Ni as a functional of  
19 temperature using Ar-H<sub>2</sub>-CH<sub>4</sub>, a hydrogen-rich gas source, at a plasma excitation power  
20 of 50 W and growth time of 300 s. Fig. S1- (a) is the evolution of Raman spectra for  
21 graphitic films grown from 200 to 800 °C, showing a continuous decrease of D band  
22 intensity and increase of G band intensity. This temperature dependent Raman spectra of  
23 these samples demonstrate a similar trend as films grown without hydrogen, however, the  
24 related intensity ratios of D to G band,  $I_D/I_G$ , and the FWHM of G band are slightly higher,  
25 as shown in Figure S1 (b)-(c). From the Raman, it is suggested that the etching effect of  
26 hydrogen radicals is not obvious at temperatures above 600 °C whereof the graphitic film  
27 growth mechanism is dominated by segregation and precipitation mechanism.

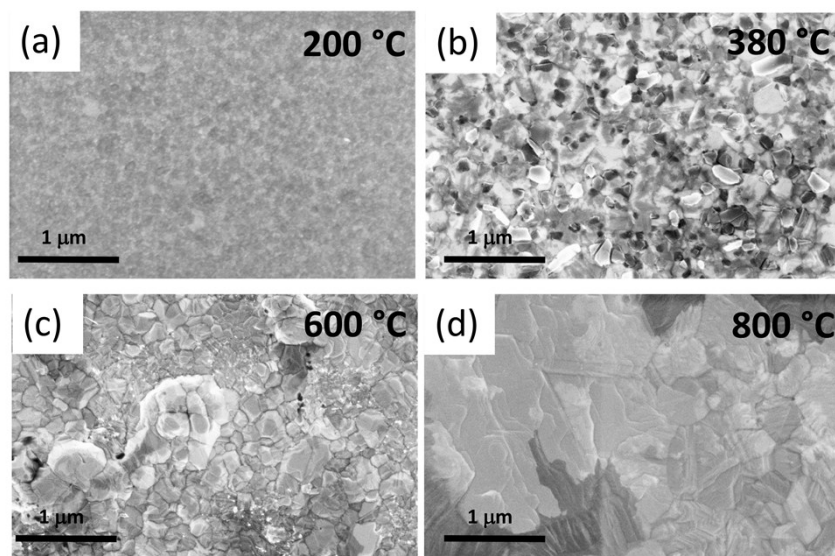

28

29

30 Fig. S2 - (a)-(d) SEM images of graphite films grown on polycrystalline Ni surface at 200,  
31 380, 600 and 800 °C, respectively using Ar-CH<sub>4</sub> gas sources at plasma power of 50 W for  
32 300 s.

33 Fig. S2 are the SEM images of graphitic film grown on polycrystalline Ni surface at 200,  
34 380, 600, and 800 °C showing the morphology changes of the graphite films at different  
35 growth temperature. At 200 °C, there is no identification of large graphitic flakes visible  
36 but the changes of Ni surface contrast in comparison to that of clean polycrystalline Ni  
37 substrate, which is constant with the formation of polycrystalline graphitic structures as is

38 expected for low temperature deposition. Some graphitic flakes, up to 200 nm, are  
39 observed apparently at 380 °C, however, the density of these graphitic flakes are low in  
40 comparison to those samples grown at 600 °C. Eventually, high quality of graphitic films,  
41 as determined from corresponding Raman spectra, are formed at 800 °C. These SEM  
42 images suggest that the original morphology of polycrystalline Ni may not have large  
43 effect on the quality of graphitic films grown on different temperatures.

44
